# Supplementary material
Source: PubMed Central journal article supplement (PMC3324519)
Supplement: supp_bts100_RINSsupp4.pdf [file supp_bts100_RINSsupp4.pdf]

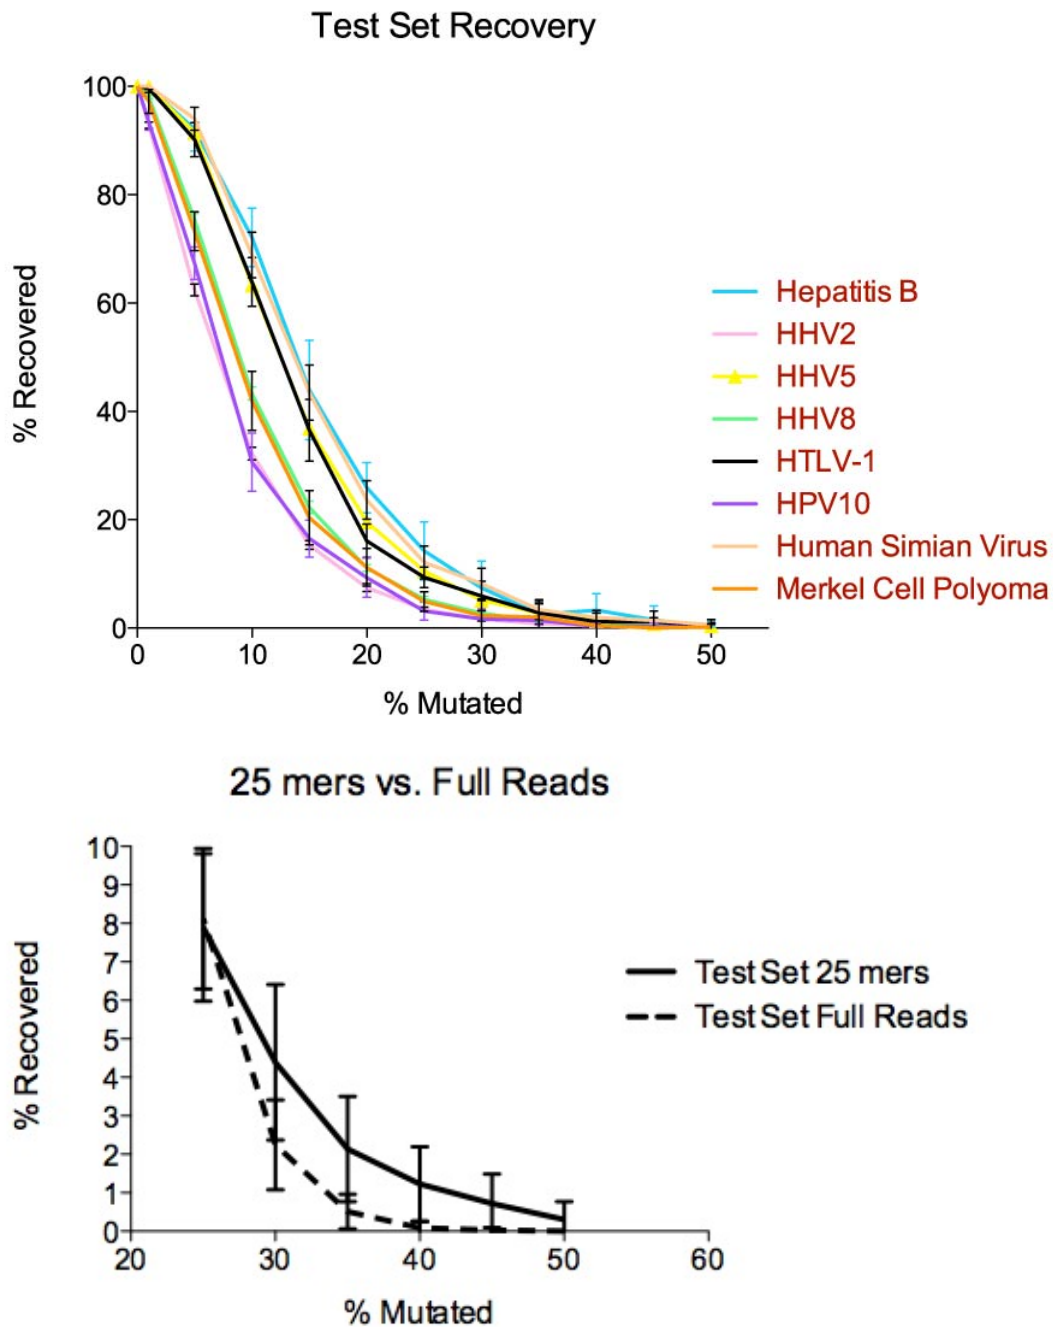

**Figure S1.** Highly mutated genomes can be identified with RINS. a) Genomes from 8 viruses (Hepatitis B, Human herpesvirus 2, Human papilloma virus 10, Merkel Cell Polyomavirus, Human herpesvirus 5, Human Simian Immunodeficiency virus, Human herpesvirus 8, Human T-lymphotrophic virus 1) were each randomly mutated at rates ranging from 1 to 50 %, and the genome was divided into mate paired reads. These reads were used as the template for RINS. Reads could be correctly identified at 35% mutation for all genomes, with some iterations still producing correct identification for all genomes even at 50% mutation. (Error bars shown as mean  $\pm$  SD, n=10). b) Using sectioned reads improves sensitivity of detecting mutated genomes. Read sets generated from the 8 mutated genomes were tested with RINS after sectioning versus full reads. 25 mer reads were on average significantly more sensitive at identifying the virus ( $p < 0.001$ ) at mutation levels above 25%.

Table S1. RINS accurately generates contigs of verifiable nonhuman sequence on a positive control dataset (SRR073726).

| Step Completed        | Reads Remaining | Percent of Total (%) |
|-----------------------|-----------------|----------------------|
| Number of Total Reads | 13,654,861      | 100                  |
| Blat                  | 37,364          | 0.27                 |
| LZW Compression       | 34,785          | 0.25                 |
| Alignment to Human    | 34,785          | 0.25                 |
| Contig Generation     | 14,458          | 0.08                 |

Table S2. Contigs generated by RINS.

|                                                                                                                                                                                                                                                                                                                                                                                                                                                                                                                                                                                                                                                                                    |
|------------------------------------------------------------------------------------------------------------------------------------------------------------------------------------------------------------------------------------------------------------------------------------------------------------------------------------------------------------------------------------------------------------------------------------------------------------------------------------------------------------------------------------------------------------------------------------------------------------------------------------------------------------------------------------|
| Human Papillomavirus Serotype 18, CA_HP10 cells (from SRR073726)                                                                                                                                                                                                                                                                                                                                                                                                                                                                                                                                                                                                                   |
| TTGTACATAAAACCAGCCGTTACAACCCGTGCCCTCCCCGTCTGTACCTTCTGGATCAGCCATTGTTGCTTACTGCTGGG<br>ATGCACACCACGGACACACAAAGGACAGGGTGTTCAGAAACAGCTGCTGGAATGCTCGAAGGTCGCTGCTGAGCTTT<br>CTACTACTAGCTCAATTCTGGCTTCACACTTACAACACATACACAACATTGTGTGACGTTGTGGTTCGGCTCGTGGGCT<br>GGTAAATGTTGATGATTAACCTCCATCTATTTTCATCGTTTTCTTCCCTCTGAGTCGCTTAATTGCTCGTGACATAGAAGGTC<br>AACCGGAATTTCAATTTGGGGCTCTAAATGCAATACAATGTCTTGAATGTTGCCTTAGGTCCATGCATACTTAATATTA<br>TACTTGTGTTTCTCTGCGTCGTTGGAGTCGTTCTGTGCTGCTCGGTTGCAGCACGAATGGCACTGGCCTCTATAGTGCC<br>CAGCTATGTTGAAATCGTCGTTTTTCATTAAGGTGTCTAAGTTTTCTGCTGGATTCAACGGTTTCTGAAATCCGGTT<br>GACCTTCTATG                                                                  |
| Laboratory contaminant with homology to HIV and lentiviral constructs (from SRA046736)                                                                                                                                                                                                                                                                                                                                                                                                                                                                                                                                                                                             |
| TTATGAGGAAAGGACAGTGGGAGTGGCACCTTCCAGGGTCAAGGAAGGCACGGGGAGGGGCAAACAACAGATGGCT<br>GGCAACTAGAAGGCACAGTCGAGGCTGATCAGCGGGTTAAACAATGTCAAGGCCTCTCACTCTCTGATATTCATTTCT<br>TTGCAAGTTATAAATACTGAATAATAAGATGACATGAACTACTACTGCTAGAGATTTCCACACTGACTAAAAGGGTCT<br>GAGGGATCTCTAGTTACCAGAGTCACACAACAGACGGGCACACACTACTTGAAGCACTCAAGGCAAGCTTTATTGAGG<br>CTTAAGCAGTGGGTTCCCTAGTTAGCCAGAGAGCTCCCAGGCTCAGATCTGGTCTAACCAGAGAGACCCAGTACAAGC<br>AAAAAGCAGATCTTGTCTTCGTTGGGAGTGAATTAGCCCTTCCAGTCCCCTCTTTCTTTAAAAAGTGGCTAAGATCTA<br>CAGTGCCTTGTAAAGTCATTGGTCTTAAAGGTACCTGAGGTGTGACTGGAAAACCCACCTCCTCCTCTTGTGCTTCT<br>AGCCAGGCACAATCAGCATTGGTAGCTGTATTGCTACTTGTGATTG<br>CTCCATGTTTTTCTAGGTCTCGACTGCAGAATTAATT |
